# Supplementary material for: A photoluminescent nanocrystal-based signaling protocol highly sensitive to nerve agents and highly toxic organophosphate pesticides
Source: Royal Society of Chemistry journal article supplement (doi:10.1039/b915159c), 2009-01-01
Supplement: b915159c.pdf [file b915159c.pdf]

# A photoluminescent nanocrystal-based signaling protocol highly sensitive to nerve agents and highly toxic organophosphate pesticides

Tao Yu,<sup>a</sup> Jiang-Shan Shen,<sup>a</sup> Hai-Hong Bai,<sup>b</sup> Lei Guo,<sup>b</sup> Ji-Jun Tang,<sup>b</sup> Yun-Bao Jiang<sup>\*,a</sup>  
and Jian-Wei Xie<sup>\*,b</sup>

*a. Department of Chemistry, College of Chemistry & Chemical Engineering, and the MOE Key*

*Laboratory of Analytical Sciences, Xiamen University, Xiamen 361005, China*

*Fax: +86 592 2185662; Tel: +86 592 2185662; E-mail: ybjiang@xmu.edu.cn*

*b. Beijing Institute of Pharmacology and Toxicology, Beijing 100850, China*

*Fax: +86 10 68225893; Tel: +86 10 68225893; E-mail: xiejw@bmi.ac.cn*

## Electronic Supplementary Information (ESI)

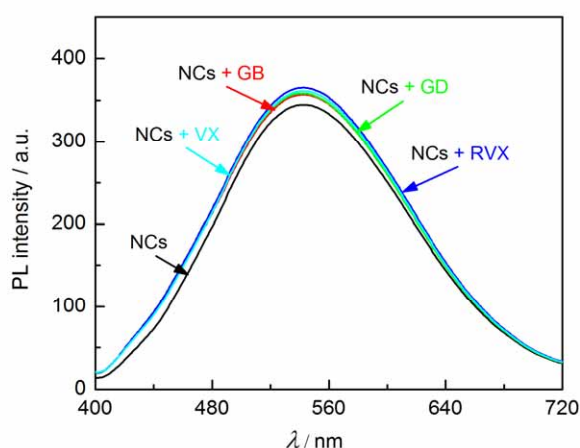

**Fig. S1** PL spectra of TGA-CdS NCs in the absence (black) and presence of 100 nM GB (red), 100 nM GD (green), 100 nM VX (cyan), and 100 nM RVX (blue). The buffer used was 20 mM Tris-HCl of pH 7.6, [NCs] = 500 nM, [ATCh] = 75  $\mu$ M,  $\lambda_{\text{ex}}$  = 370 nm.

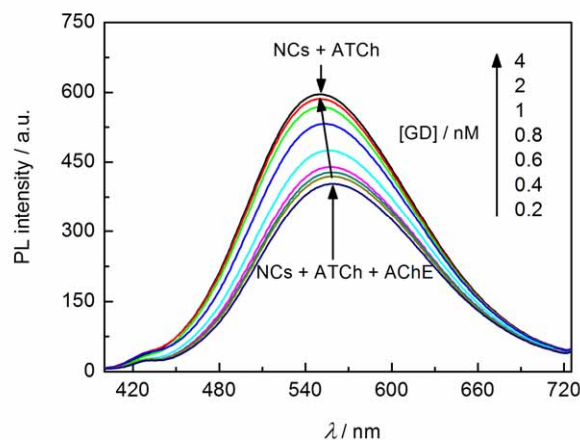

**Fig. S2** PL spectra of TGA-CdS NCs in ATCh/AChE enzyme catalytic reaction solution with varying concentration of GD. The buffer used was 20 mM Tris-HCl of pH 7.6, [NCs] = 500 nM, [ATCh] = 75  $\mu$ M, [AChE] = 0.016 units  $\text{mL}^{-1}$ ,  $\lambda_{\text{ex}}$  = 370 nm.

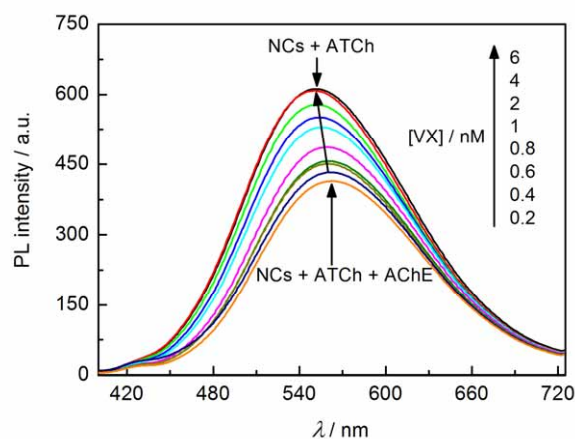

**Fig. S3** PL spectra of CdS NCs in ATCh/AChE enzyme catalytic reaction solution with varying concentration of VX. The buffer used was 20 mM Tris-HCl of pH 7.6, [NCs] = 500 nM, [ATCh] = 75  $\mu$ M, [AChE] = 0.016 units  $\text{mL}^{-1}$ ,  $\lambda_{\text{ex}}$  = 370 nm.

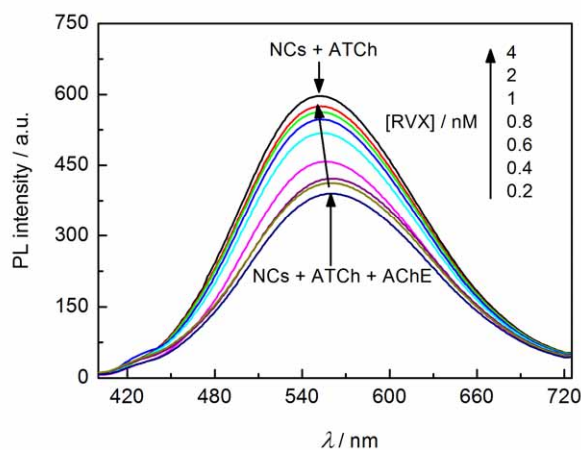

**Fig. S4** PL spectra of CdS NCs in ATCh/AChE enzyme catalytic reaction solution with varying concentration of RVX. The buffer used was 20 mM Tris-HCl of pH 7.6, [NCs] = 500 nM, [ATCh] = 75  $\mu$ M, [AChE] = 0.016 units mL<sup>-1</sup>,  $\lambda_{\text{ex}}$  = 370 nm.

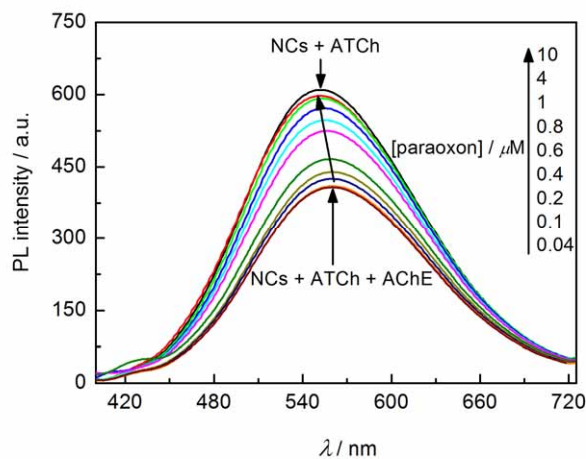

**Fig. S5** PL spectra of CdS NCs in ATCh/AChE enzyme catalytic reaction solution with varying concentration of paraoxon. The buffer used was 20 mM Tris-HCl of pH 7.6, [NCs] = 500 nM, [ATCh] = 75  $\mu$ M, [AChE] = 0.016 units mL<sup>-1</sup>,  $\lambda_{\text{ex}}$  = 370 nm.
